# Supplementary material
Source: publisher figshare collection journal article supplement (https://acs.figshare.com/ndownloader/files/4884703)
Supplement: Supplementary file 1 [file 4884703]

## Support Information

### **Enhanced Anti-Tumor Activity of EGFP-EGF1-Conjugated Nanoparticles by a Multi-Targeting Strategy**

Bo Zhang<sup>a,1</sup>, Ting Jiang<sup>a,1</sup>, Li Ling<sup>b</sup>, Zhonglian Cao<sup>c</sup>, Jingjing Zhao<sup>b</sup>, Yanyan Tuo<sup>b</sup>, Xiaojian She<sup>b</sup>,  
Shun Shen<sup>b</sup>, Xinguo Jiang<sup>b</sup>, Yu Hu<sup>a\*</sup>, Zhiqing Pang<sup>b\*</sup>

<sup>a</sup>Institute of Hematology, Union Hospital, Tongji Medical College, Huazhong University of Science & Technology, Wuhan, Hubei, 430022, China;

<sup>b</sup>School of Pharmacy, Fudan University, Key Laboratory of Smart Drug Delivery, Ministry of Education, 826 Zhangheng Road, Shanghai, 201203, China;

<sup>c</sup>Instrumental Analysis Center of School of Pharmacy, Fudan University, 826 Zhangheng Road, Shanghai, 201203, China

1: equal contribution to the work

\* Corresponding author:

Yu Hu,

Institute of Hematology, Union Hospital, Tongji Medical College, Huazhong University of Science & Technology, Wuhan, Hubei, 430022, PR China.

Tel.: +86-27-85726335; fax: +86-27-85776343. E-mail address: dr\_huyu@126.com (Y. Hu).

Zhiqing Pang,

School of Pharmacy, Fudan University, Key Laboratory of Smart Drug Delivery, Ministry of Education, 826 Zhangheng Road, Shanghai, 201203, China

Tel.: +86-21-51980069; fax: +86-21-51980069. E-mail address: zqpang@fudan.edu.cn

Table S 1 Analysis of A549 cells apoptosis induced by different PTX formulations (n=3)

| Treatment | Annexin-FITC+<br>(%)     | Annexin-FITC+<br>PI+ (%) | PI+ (%)                | Total                     |
|-----------|--------------------------|--------------------------|------------------------|---------------------------|
| Control   | 1.98±0.42                | 4.89±1.02                | 0.45±0.20              | 7.26±1.52                 |
| Taxol     | 6.71±0.70 <sup>a</sup>   | 9.14±0.78 <sup>a</sup>   | 1.62±0.10 <sup>a</sup> | 19.49±0.71 <sup>a</sup>   |
| NP-PTX    | 8.43±0.09 <sup>a</sup>   | 10.84±1.42 <sup>a</sup>  | 0.98±0.33              | 20.25±1.59 <sup>a</sup>   |
| ENP-PTX   | 10.13±1.34 <sup>ab</sup> | 12.47±0.39 <sup>ab</sup> | 1.41±0.29 <sup>a</sup> | 24.05±1.39 <sup>abc</sup> |

<sup>a</sup> $p < 0.05$ , compared with Control. <sup>b</sup> $p < 0.05$ , compared with Taxol. <sup>c</sup> $p < 0.05$ , compared with NP-PTX.

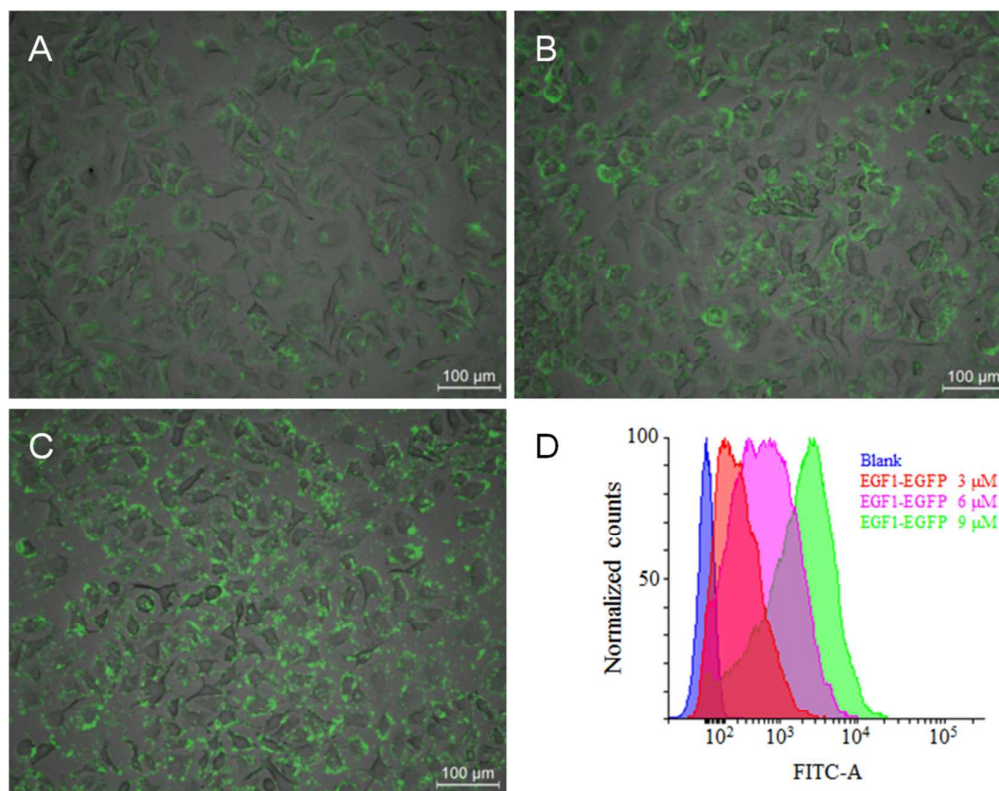

Figure S 1 EGFP-EGF1 protein binding to A549 cells evaluated by fluorescence microscopy qualitatively (A, B, C) and flow cytometry quantitatively (D) after incubation for 6 h (n=3). The protein concentration was 3  $\mu$ M (A), 6  $\mu$ M (B) and 9  $\mu$ M (C), respectively.

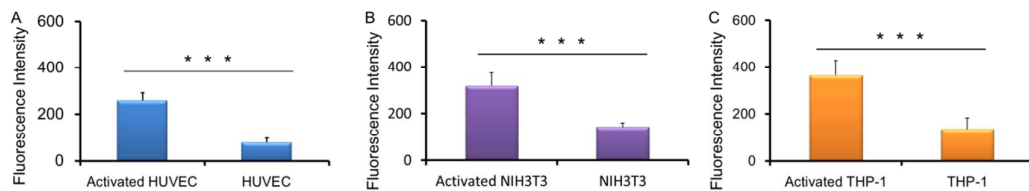

Figure S 2 EGFP-EGF1 protein binding to HUVEC (A), NIH3T3 (B) or THP-1 (C) activated with corresponding stimulating factor or not. The results were evaluated by flow cytometry quantitatively after incubation with 9  $\mu$ M of EGFP-EGF1 protein for 6 h (n=3).

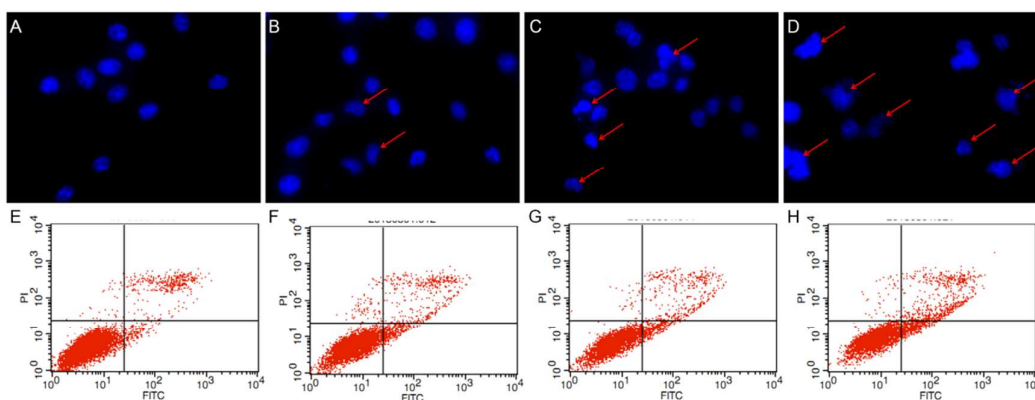

Figure S 3 Apoptosis of A549 cells induced by different PTX formulations including Taxol (B & F), NP-PTX (C & G) and ENP-PTX (D & H). A549 cells without drug treatment served as control (A & E). The results was analyzed qualitatively by fluorescence microscopy (A, B, C & D) and quantitatively by flow cytometry (E, F, G & H). The cell nucleus was stained by Hoechst 33342. The red arrows indicated cell apoptosis. Original magnification: 200 $\times$ .

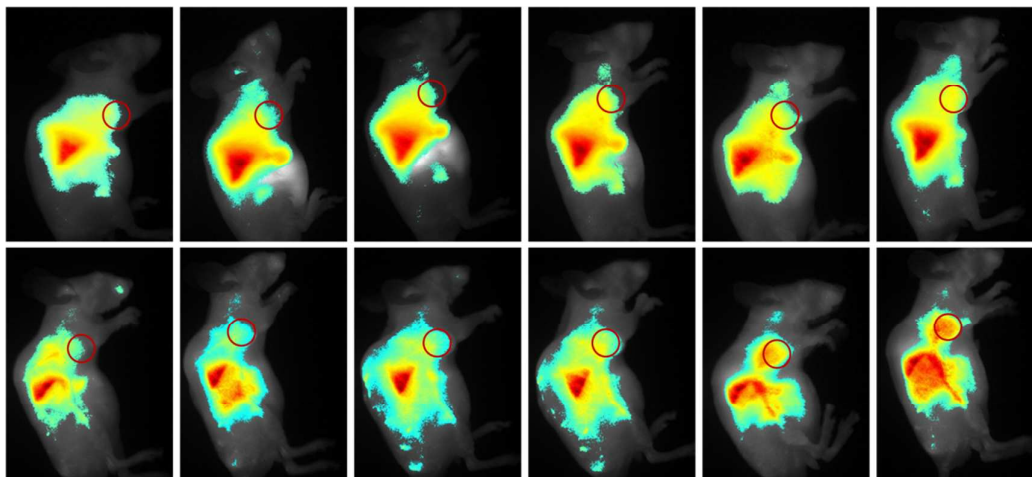

Figure S 4 *In vivo* imaging of A549 xenograft-bearing nude mice at different time points (1 h, 2 h, 4 h, 6 h, 8 h, 12 h) after administration with DiR-labeled NP (upper row) or ENP (lower row).

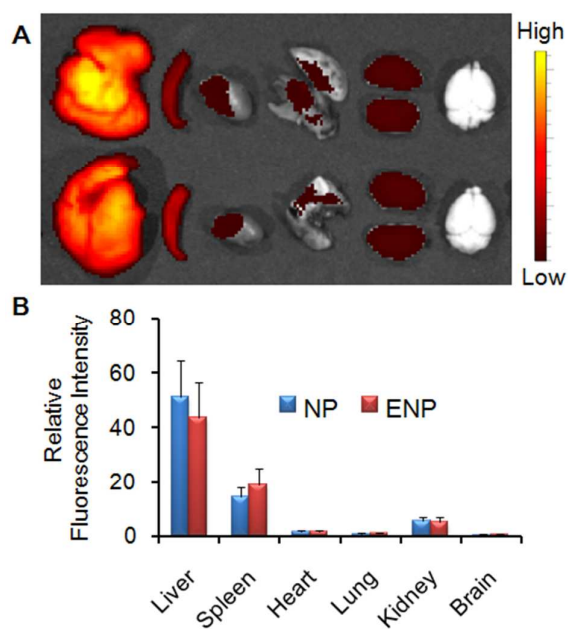

Figure S 5 Distributions of DiR-labeled NP (upper row) and ENP (lower row) in normal major organs (From left to right: liver, spleen, heart, lung, kidney, brain) analyzed by *in vivo* imaging system qualitatively (A) and semi-quantitatively (B).

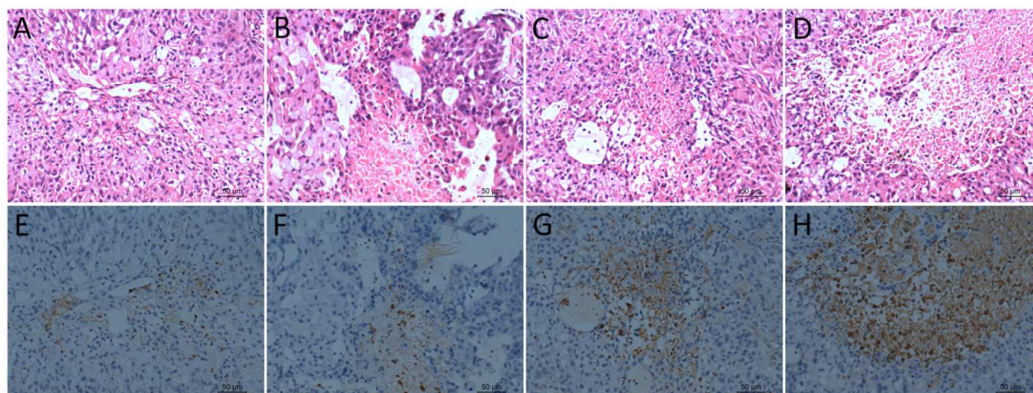

Figure S 6 H&E staining (A, B, C, D) and TUNEL staining (E, F, G, H) of tumor tissue sections obtained from animal models at day 18 after treatment for saline (A & E), Taxol (B & F), NP-PTX (C & G) and ENP-PTX (D & H), respectively.
